# Supplementary material
Source: PubMed Central journal article supplement (PMC2710958)
Supplement: blood-2008-12-194845_1.pdf [file blood-2008-12-194845_1.pdf]

| <b>Gene Symbol</b> | <b>Forward primer 5'-3'</b> | <b>Reverse primer 5'-3'</b> |
|--------------------|-----------------------------|-----------------------------|
| APA2               | AGGCTGTGAACCTGCTGAGT        | CTGGCCAGGTCATTCTTGAT        |
| CCL3               | TGCTCAGAATCATGCAGGTC        | GGGAGGTGTAGCTGAAGCAG        |
| CCL5               | CGCTGTCATCCTCATTGCTA        | GCACTTGCCACTGGTGTAGA        |
| CD48               | GGGAATGAGCAAGAATGGAA        | CAGACTCGCCAGGTATCACA        |
| CDK5               | CAAGCTGTACTCCACGTCCA        | CTGGTCATCGACATCATTGC        |
| CTSB               | TGGAGGGAGCTTTCTCTGTG        | TGACGTGTTGGTACACTCCTG       |
| CTSC               | CGATGTCAACTGCTCGGTTA        | GATGGTCAAATGGCCAGAAT        |
| CTSH               | ACTGGCTGTTGGGTATGGAG        | AGGCCACACATGTTCTTTCC        |
| CTSL               | CTGGGAATTGCCTCAGCTAC        | TTCTCCACACTGCTCTCTCT        |
| CTSS               | TACGATCTGGGCATGAACC         | GGGAACTCTCAGGGAACTCA        |
| CTSZ               | TCCTTATAGGTGCTGGTCACG       | TCCTTATAGGTGCTGGTCACG       |
| CSTA1              | ACGGAAAATTGGAAGCTGTG        | TTTGTCCGGGAAGACTTTTG        |
| CST3               | CGAGTACAACAAAGCCAGCA        | GGGTCTTGGTACACGTGGTT        |
| CST7               | AACCAACCACACCTTGAAGC        | TGCATCCTGGTGTGTTGTCAT       |
| DNM1               | GCACCAAGAAGCTCCAGCAG        | GTTGGTGTTTCATGTAAGCCAGC     |
| EPS15              | GGTGAACAACCTCGGAGAGA        | GCCTGGAACTTGCTGAAGTC        |
| IL10RB             | GCTGTGGTGCCTTACAAGA         | CCGACAATGGAAAAGGAGAAA       |
| IL13RA1            | GTCCCTGGTGTCTTCCCTGA        | AGTGTGGAATTGCGCTTCTT        |
| IRF1               | AAGTCCAGCCGAGATGCTAA        | TAGCTGCTGTGGTCATCAGG        |
| IRF2               | TTTTTCAGATCCCTGGATG         | AATTCGCTTCCATGTTTTG         |
| GIP2               | CGAACTCATCTTGCCAGT          | CTTCAGCTCTGACACCGACA        |
| MX1                | ACCACAGAGGCTCTCAGCAT        | CTTCAGGTGGAACACGAGGT        |
| NFKBIA             | CTTGGGTGCTGATGTCAATG        | CCCCACACTTCAACAGGAGT        |
| OAS1               | CAAGCTCAAGAGCCTCATCC        | TGGGCTGTGTTGAAATGTGT        |
| RAB5A              | GGTGAACAACCTCGGAGAGA        | GCCTGGAACTTGCTGAAGTC        |
| RPL31              | TGCCATCAACGAAGTGGTAA        | CATGGCAAATTTCCGAATCT        |
| SOCS3              | CAAGGACGGAGACTTCGATT        | AACTTGCTGTGGGTGACCAT        |
| STAT3              | GGCCATCTTGAGCACTAAGC        | CGGACTGGATCTGGGTCTTA        |
| TARBP              | CCGAACAGGACCTGAAAGAG        | AAAGCCAAACCCCTTTGAAT        |
