# Supplementary material
Source: PubMed Central journal article supplement (PMC2710958)
Supplement: blood-2008-12-194845_2.pdf [file blood-2008-12-194845_2.pdf]

| B Values     |           |           |                   |           |           | Fold Change  |       |        |                   |       |        |
|--------------|-----------|-----------|-------------------|-----------|-----------|--------------|-------|--------|-------------------|-------|--------|
| Viable HIV-1 |           |           | Inactivated HIV-1 |           |           | Viable HIV-1 |       |        | Inactivated HIV-1 |       |        |
| B Value      | Sen %     | Spec %    | B Value           | Sen %     | Spec %    | FC           | Sen % | Spec % | FC                | Sen % | Spec % |
| -1.25        | 92        | 74        | -3.35             | 59        | 70        | 1.15         | 100   | 10     | 1.15              | 94    | 33     |
| -1.15        | 92        | 77        | -3.25             | 59        | 72        | 1.25         | 100   | 31     | 1.25              | 88    | 36     |
| -1.05        | 98        | 77        | -3.00             | 59        | 77        | 1.35         | 100   | 33     | 1.35              | 77    | 45     |
| -0.90        | 88        | 79        | -2.75             | 59        | 79        | 1.45         | 92    | 36     | 1.45              | 53    | 53     |
| <b>-0.50</b> | <b>88</b> | <b>85</b> | <b>-2.60</b>      | <b>59</b> | <b>81</b> | 1.55         | 92    | 38     | 1.55              | 53    | 62     |
| -0.05        | 88        | 85        | -2.25             | 59        | 83        | 1.65         | 76    | 41     | 1.65              | 47    | 66     |
| +0.15        | 84        | 90        | -1.60             | 53        | 85        | 1.75         | 76    | 51     | 1.75              | 35    | 70     |
| +0.25        | 84        | 92        | -1.15             | 53        | 89        | 1.85         | 68    | 59     | 1.85              | 35    | 77     |
| +0.35        | 80        | 92        | -1.00             | 53        | 94        | 1.95         | 64    | 67     | 1.95              | 35    | 79     |
