# Supplementary material
Source: PubMed Central journal article supplement (PMC2710958)
Supplement: blood-2008-12-194845_3.pdf [file blood-2008-12-194845_3.pdf]

| <b>Viable HIV</b> |               |                                                 |           |          |
|-------------------|---------------|-------------------------------------------------|-----------|----------|
| <b>Acc No</b>     | <b>Symbol</b> | <b>Name</b>                                     | <b>FC</b> | <b>B</b> |
| R76314            | RHOG          | Ras homolog gene family, member G (rho G)       | 1.5       | 3.6      |
| AA626028          | EHD1          | EH-domain containing 1                          | 1.6       | 1.3      |
| AA458993          | PRKCZ         | Protein kinase C, zeta                          | 1.4       | 0.8      |
| AA416787          | M6PRBP1       | Mannose-6-phosphate receptor binding protein 1  | 1.9       | 0.6      |
| AA504615          | STARD3        | START domain containing 3                       | 1.5       | 0.6      |
| N74995            | RAB35         | RAB35, member RAS oncogene family               | 1.6       | 0.4      |
| AA454836          | VPS52         | Vacuolar protein sorting 52 (yeast)             | 1.4       | -0.2     |
| AA025059          | RAB11A        | RAB11A, member RAS oncogene family              | 1.5       | -0.3     |
| AA456291          | DRG2          | Developmentally regulated GTP binding protein 2 | 1.5       | -0.6     |
| H28973            | LAMP1         | Lysosomal-associated membrane protein 1         | 1.4       | -0.8     |

| <b>Inactivated HIV</b> |               |                                                        |           |          |
|------------------------|---------------|--------------------------------------------------------|-----------|----------|
| <b>Acc No</b>          | <b>Symbol</b> | <b>Name</b>                                            | <b>FC</b> | <b>B</b> |
| AA487912               | GNB1          | Guanine nucleotide binding protein, beta polypeptide 1 | 2.0       | -0.1     |
| R76314                 | RHOG          | Ras homolog gene family, member G (rho G)              | 1.3       | -0.2     |
| AA025059               | RAB11A        | RAB11A, member RAS oncogene family                     | 1.5       | -0.3     |
| AA416787               | M6PRBP1       | Mannose-6-phosphate receptor binding protein 1         | 1.9       | -0.4     |
| H28973                 | LAMP1         | Lysosomal-associated membrane protein 1                | 1.4       | -1.8     |
| AA454836               | VPS52         | Vacuolar protein sorting 52 (yeast)                    | 1.3       | -1.9     |
| AA485141               | SLA           | Src-like-adaptor                                       | 2.2       | -1.9     |
| AA458993               | PRKCZ         | Protein kinase C, zeta                                 | 1.5       | -2.0     |
| AA504615               | STARD3        | START domain containing 3                              | 1.4       | -2.4     |
| AA496780               | RAB7          | RAB7, member RAS oncogene family                       | 1.2       | -2.6     |
